# Supplementary material for: Acylation is rate-limiting in glycosylasparaginase-catalyzed hydrolysis of N4-(4′-substituted phenyl)-l-asparagines
Source: Royal Society of Chemistry journal article supplement (doi:10.1039/b301513k), 2003-01-01
Supplement: b301513k.pdf [file b301513k.pdf]

Supplementary Material for Organic & Biomolecular Chemistry  
This journal is © The Royal Society of Chemistry 2003

## Supplementary data

Acylation is rate-limiting in glycosylasparaginase-catalyzed hydrolysis of *N*<sup>4</sup>-(4'-substituted phenyl)-L-asparagines

Wenjun Du and John M. Risley\*

Department of Chemistry, The University of North Carolina at Charlotte, 9201  
University City Blvd., Charlotte, North Carolina 28223-0001, USA;  
jmriley@email.uncc.edu

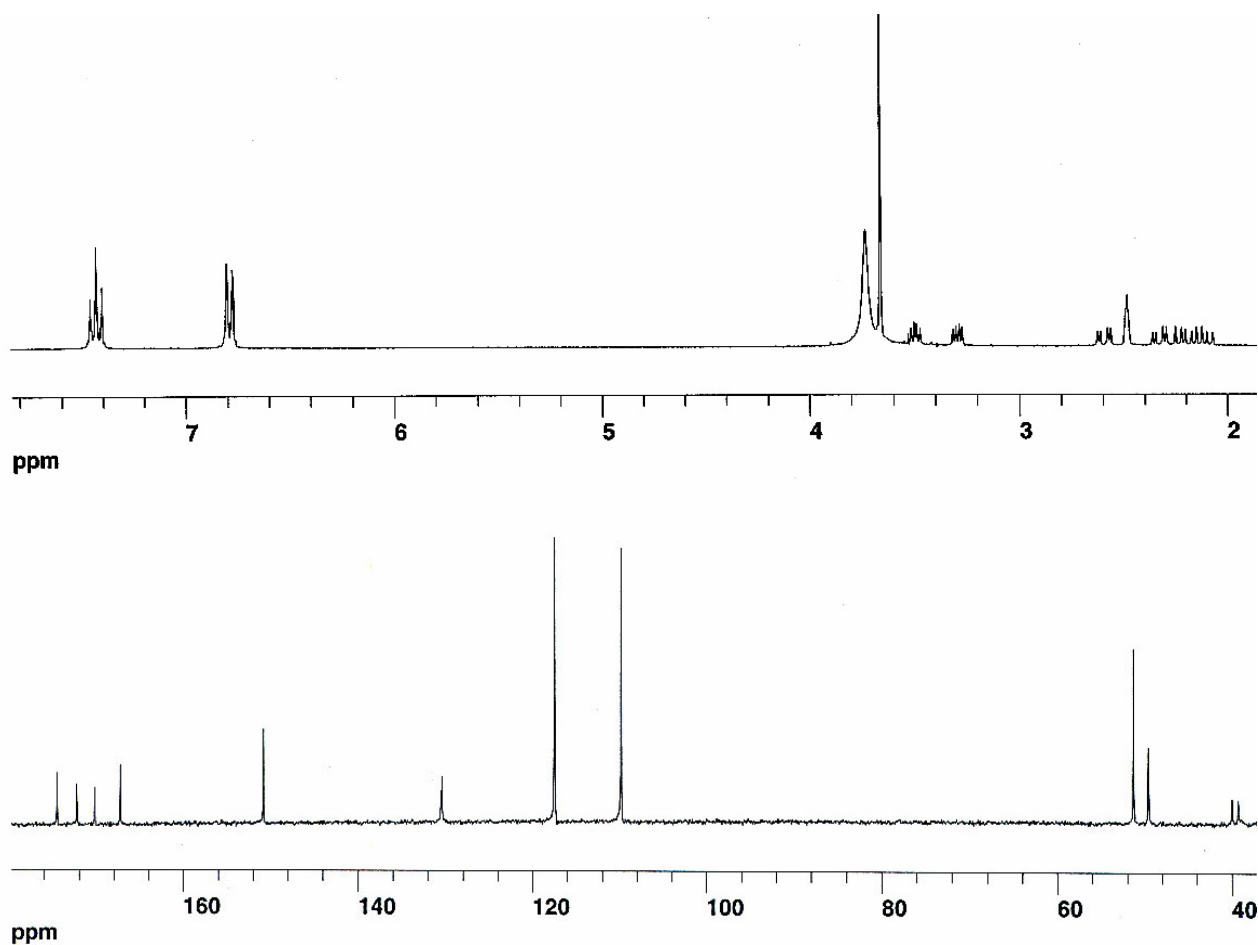

Supplementary Figure 1. The  $^1\text{H}$  NMR spectrum (top) and  $^{13}\text{C}$  NMR spectrum (bottom) of the product of the synthesis (Figure 1) using 4-methoxyaniline shows an equal mixture of  $N^4$ -(4'-methoxyphenyl)-L-asparagine (**6**) and  $N^1$ -(4'-methoxyphenyl)-L-asparagine (**7**). One set of signals for each isomer is present in the  $^1\text{H}$  NMR spectrum;  $\delta$  2.50 is dimethyl sulfoxide as internal reference and  $\delta$  3.75 is HDO. Two signals each for C-1 and C-4 ( $\delta \approx 170$ ) and C-3 ( $\delta \approx 40$ ) in L-asparagine are present in the  $^{13}\text{C}$  NMR spectrum.

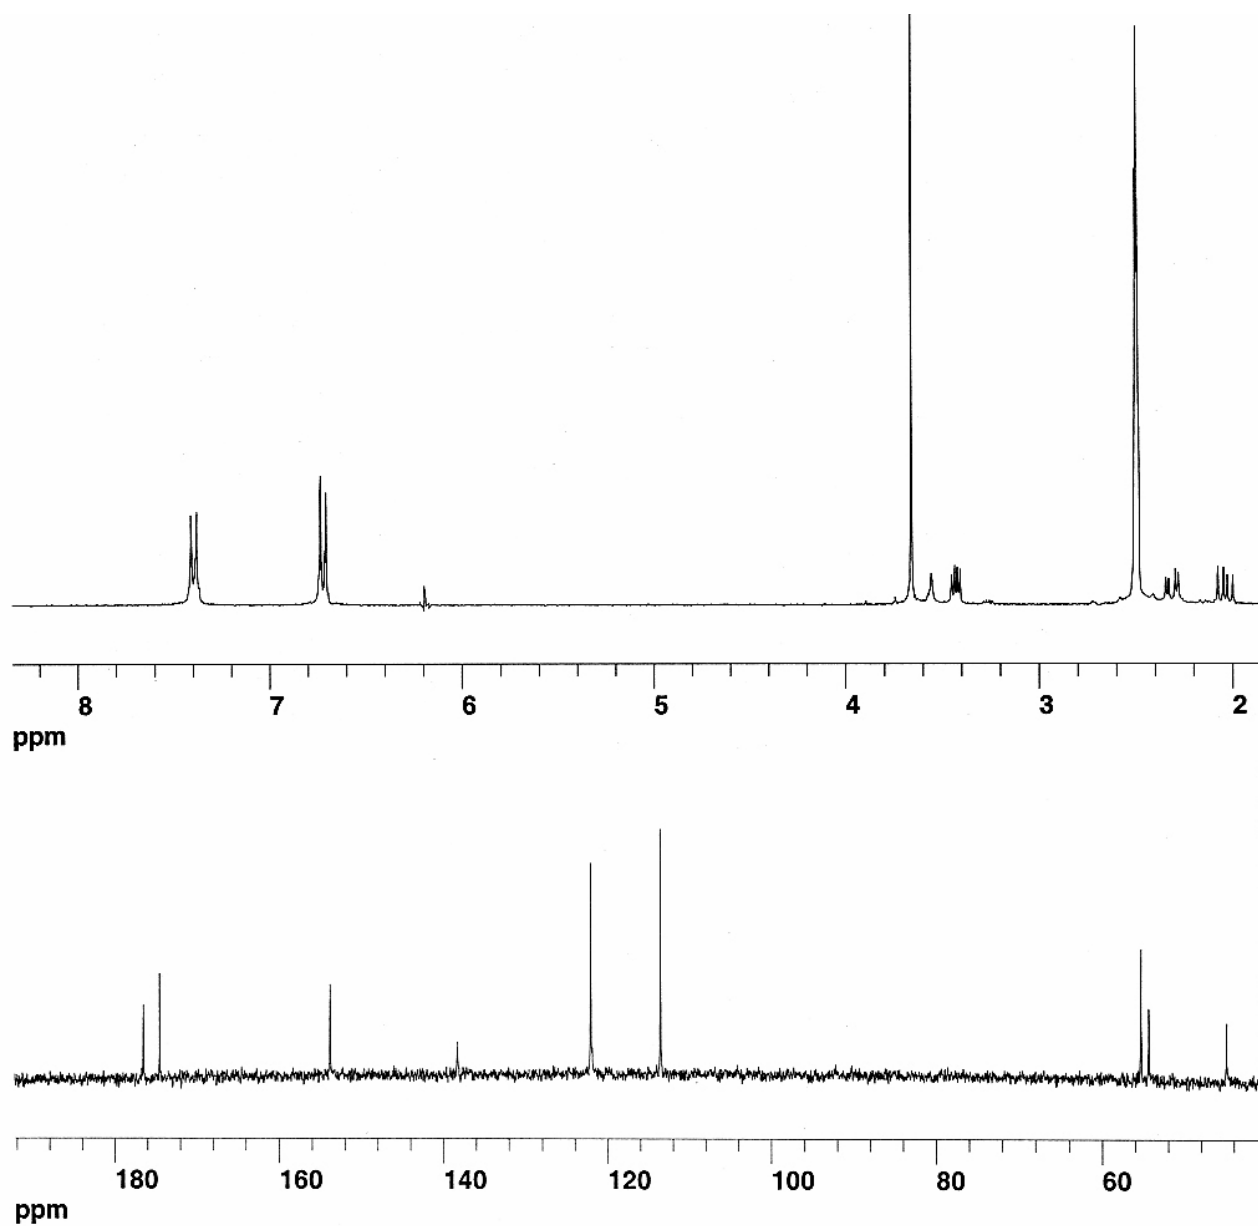

Supplementary Figure 2. After separation of the mixture in Supplementary Figure 1, the signals in the  $^1\text{H}$  NMR spectrum (top) and  $^{13}\text{C}$  NMR (bottom) were assigned to the pure isomer  $N^4$ -(4'-methoxyphenyl)-L-asparagine (**6**).

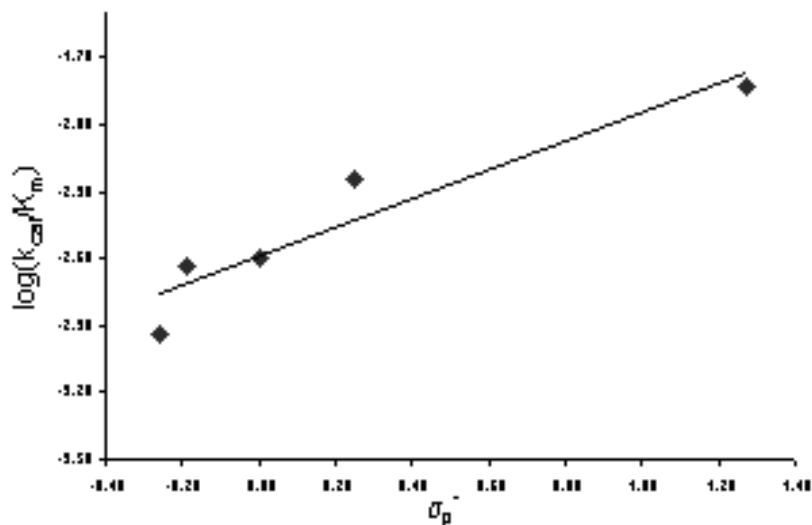

Supplementary Figure 3. A Hammett plot of  $\log(k_{\text{cat}}/K_m)$  vs  $\sigma_p^-$  is linear with a slope  $\rho = 0.65$  ( $r = 0.95$ ). The positive slope is indicative of a favorable effect on the binding step with increasingly electron-withdrawing substituents. The substituent effect suggests that the electron distribution of the substrate is perturbed toward the transition state.

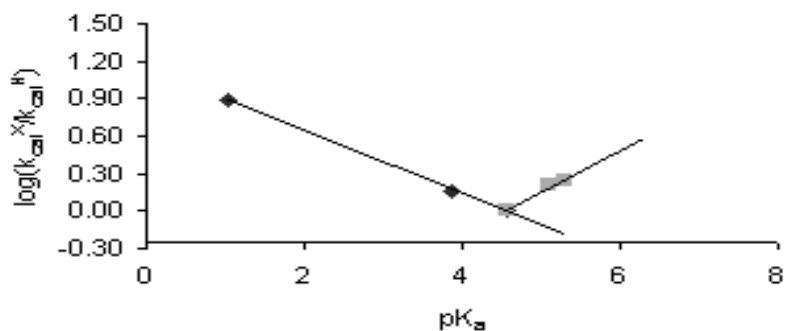

Supplementary Figure 4. A Brønsted plot of  $\log(k_{\text{cat}}^{\text{X}}/k_{\text{cat}}^{\text{H}})$  vs  $\text{pK}_{\text{a}}$  for the conjugate acid of the leaving group is biphasic. The charge on the nitrogen atom in the anilines containing electron-withdrawing groups is (slope)  $\beta_{\text{lg}} = -0.25$  ( $r = 1.00$ ) and in anilines containing electron-donating groups is (slope)  $\beta_{\text{lg}} = 0.43$  ( $r = 0.98$ ).

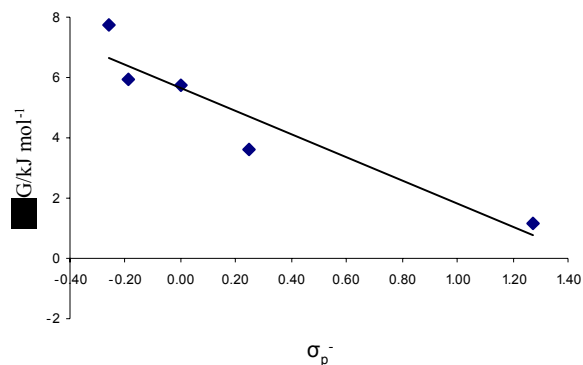

Supplementary Figure 5. A plot of the free energy (incremental) change of binding ( $\Delta\Delta G_b$ ) for the substituted anilides relative to the natural substrate vs  $\sigma_p^-$  is linear (slope  $\rho = -3.845$ ,  $r = 0.95$ ). The data indicate that, in the enzyme-substrate transition state complexes, the substitution of a substituted phenyl group for the pyranosyl group results in an overall loss of binding energy equivalent to a weak hydrogen bond, the magnitude of which is dependent on the electronic properties of the substituent group.
